# Supplementary material
Source: publisher figshare collection journal article supplement (https://acs.figshare.com/ndownloader/files/4253590)
Supplement: Supplementary file 1 [file 4253590]

**Supporting Information**

# Synthesis of Biocompatible PEG-based Star Polymers with Cationic and Degradable Core for siRNA Delivery

*Hong Y. Cho,<sup>1,a</sup> Abiraman Srinivasan,<sup>2,a</sup> Joanna Hong,<sup>2</sup> Eric Hsu,<sup>2</sup> Shiguang Liu,<sup>2</sup> Arun Shrivats,<sup>2</sup> Dan Kwak,<sup>2</sup> Andrew K. Bohaty,<sup>1</sup> Hyun-jong Paik,<sup>3</sup> Jeffrey O. Hollinger,<sup>2</sup> and Krzysztof Matyjaszewski<sup>1,\*E</sup>*

<sup>1</sup> Department of Chemistry, Carnegie Mellon University, 4400 Fifth Avenue, Pittsburgh,  
Pennsylvania 15213

<sup>2</sup> Bone Tissue Engineering Center, Carnegie Mellon University, 5000 Forbes Avenue,  
Pittsburgh, Pennsylvania 15213

<sup>3</sup> Department of Polymer Science and Engineering, Pusan National University, Busan, South  
Korea

Corresponding author. Email: [km3b@andrew.cmu.edu](mailto:km3b@andrew.cmu.edu)

<sup>a</sup> Both authors contributed equally to this work

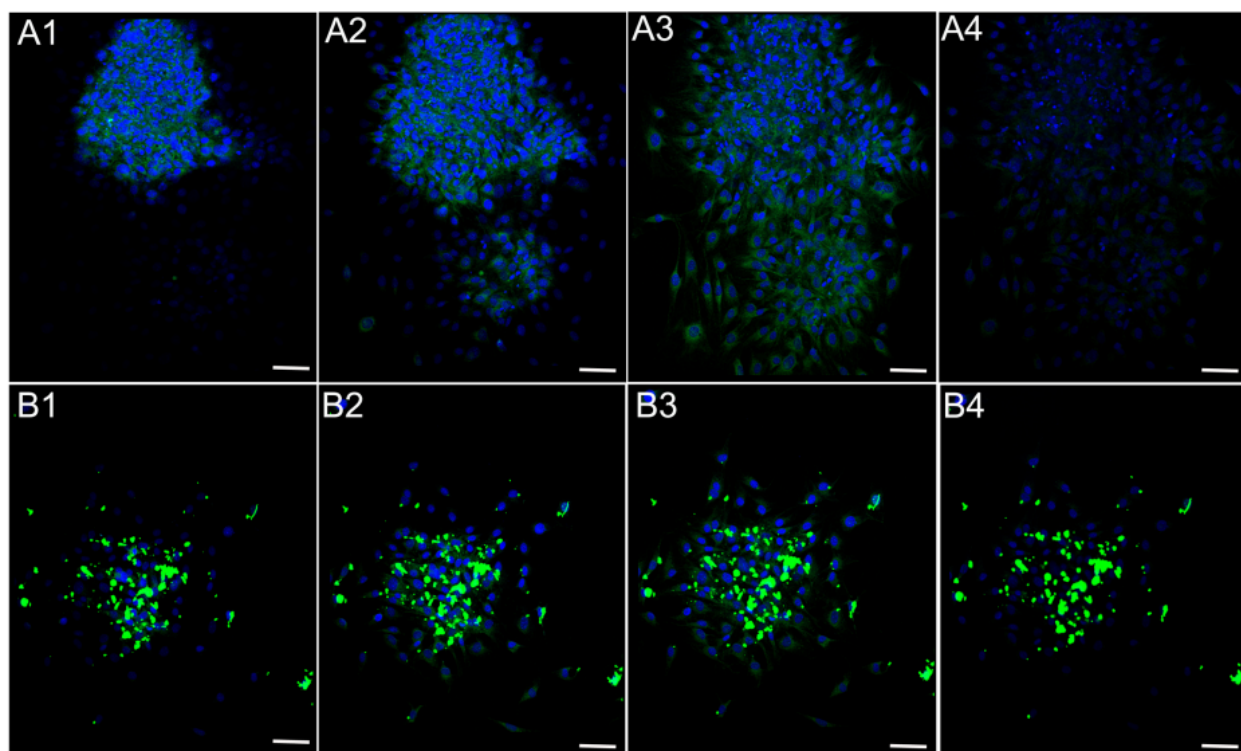

**Figure S1.** Confocal microscopy z-stack images of cell internalization of siRNA-FITC complexed with QN-SS (A1-4) and N-TER (B1-4) after 24 h incubation with MC3T3-E1.4 cells. Pancytoplasmic cellular internalization was observed for both QN-SS and N-TER but N-TER showed large particle aggregation. Multiple views were randomly selected and the scale bar represents 100  $\mu\text{m}$ .

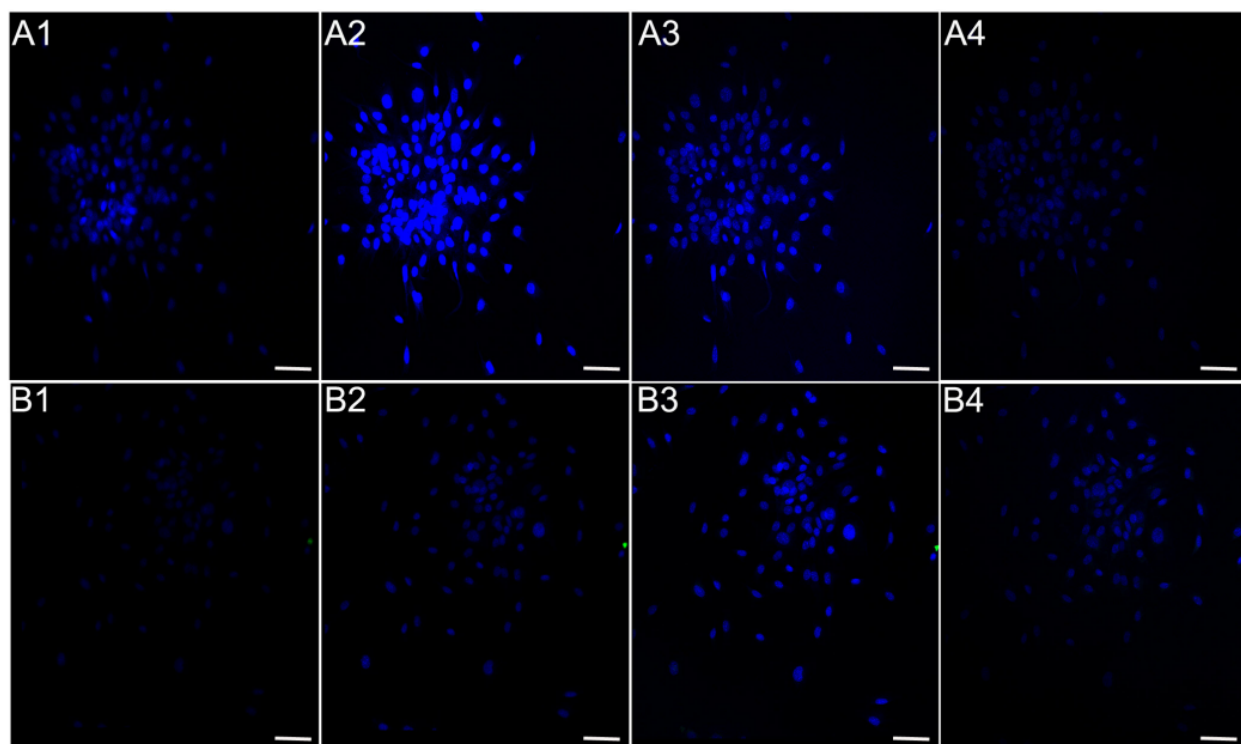

**Figure S2.** Confocal microscopy z-stack images of MC3T3-E1.4 cells only (A1-4) and MC3T3-E1.4 cells incubated with naked siRNA-FITC (B1-4) after 24 h. z-stack analysis revealed poor or no cellular internalization of naked siRNA. Multiple views were randomly selected and the scale bar represents 100  $\mu\text{m}$ .
